# Supplementary material for: Total escape of SARS-CoV-2 from dual monoclonal antibody therapy in an immunocompromised patient
Source: PubMed Central journal article supplement (PMC10085998; doi:10.1038/s41467-023-37591-w), 2023-04-10
Supplement: 41467_2023_37591_MOESM3_ESM.pdf [file 41467_2023_37591_MOESM3_ESM.pdf]

## **Description of Additional Supplementary Files**

**Supplementary Data 1:** All GISAID accession numbers and associated metadata.
